# Supplementary material
Source: PubMed Central journal article supplement (PMC3894609)
Supplement: NIHMS543983-supplement-SI.pdf [file NIHMS543983-supplement-SI.pdf]

# A Unified Electrocatalytic Description of the Action of Inhibitors of Nickel Carbon Monoxide Dehydrogenase

Vincent C.-C. Wang<sup>†</sup>, Mehmet Can<sup>‡</sup>, Elizabeth Pierce<sup>‡</sup>, Stephen W. Ragsdale<sup>\*‡</sup>,  
and Fraser A. Armstrong<sup>\*†</sup>

<sup>†</sup>Department of Chemistry, Inorganic Chemistry Laboratory, University of Oxford, South Park Road,  
Oxford, OX1 3QR, U.K. <sup>‡</sup>Department of Biological Chemistry, University of Michigan, Ann Arbor,  
Michigan 48109-0606

## Supporting Information

**Figure S1.** CO product inhibition at -760mV.

**Figure S2.** Effect of cyanide on CO<sub>2</sub> reduction, using a lower concentration of cyanide.

**Figure S3.** Cyanide inhibition of the CO oxidation activity of CODHI<sub>Ch</sub> observed at two different potentials.

**Figure S4.** Cyanate inhibition of CO<sub>2</sub> reduction activity of CODHI<sub>Ch</sub>.

**Figure S5.** EPR spectra of CODHI<sub>Ch</sub> at different powers and temperatures.

**Figure S6.** Comparison of the rates of inhibition by cyanide and sulfide.

**Table S1.**  $K_m$  values for CO<sub>2</sub> and inhibition constants for CO product inhibition, at two different potentials

**Figure S1. CO product inhibition at -760mV.** The CO concentration was held constant at 20% during the experiment. The percentage numbers indicate the percentage of CO<sub>2</sub> used in the total gas atmosphere. Argon was used to control the total gas balance. The inset figure shows the resulting Lineweaver-burk plot.

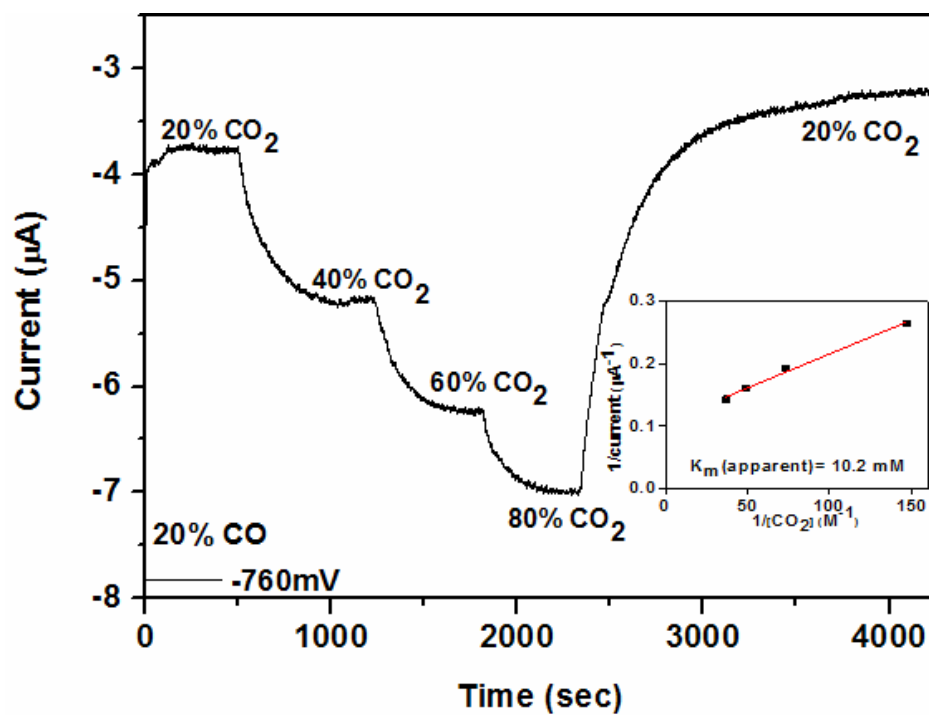

**Figure S2:** Cyclic voltammograms showing the potential and time dependence of inhibition of CODH  $I_{Ch}$  by cyanide at lower concentration than shown in Figure 3a. After a complete cycle, KCN was injected into the electrochemical cell at -0.74 V to give a final concentration of 0.1 mM. Experimental conditions: 25°C, 0.2 M MES buffer (pH=7.0), scan rate 1 mV s<sup>-1</sup>

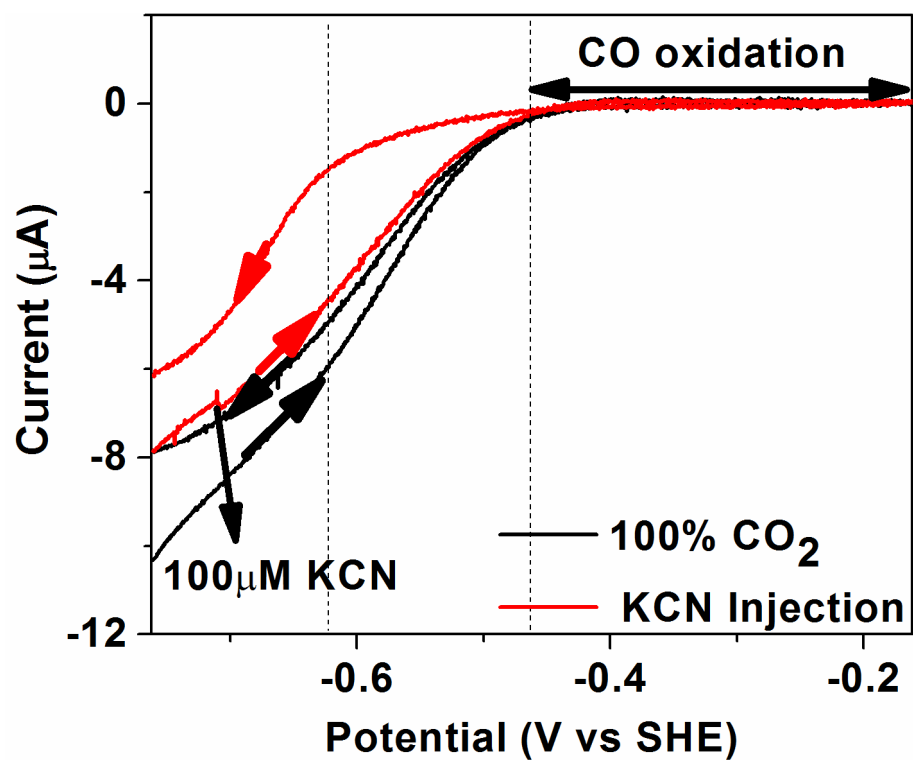

**Figure S3. Inhibition of the CO oxidation activity of CODH<sub>Ch</sub> by cyanide observed at two different potentials.** Experimental conditions: 25°C, 0.2 M MES buffer (pH=7.0), rotation rate 3500 rpm and scan rate 1mV/sec

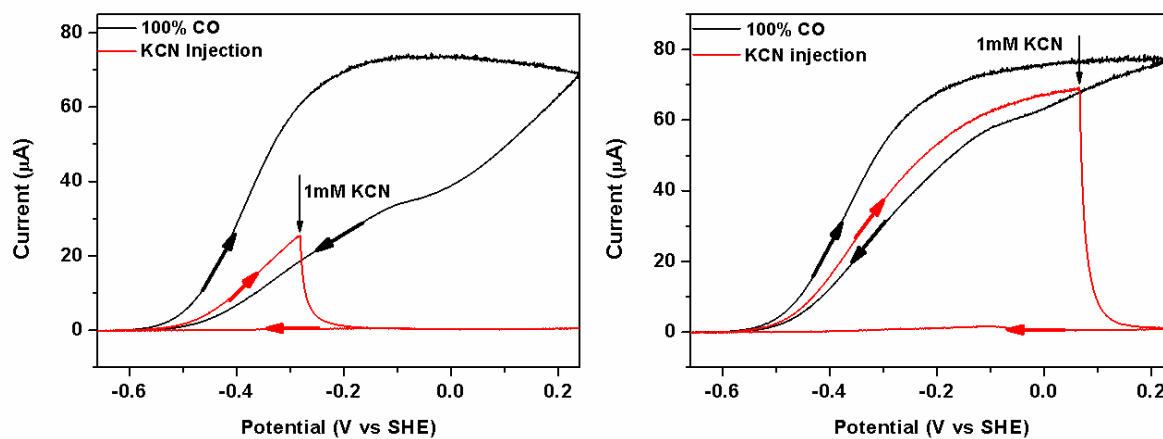

**Figure S4 Inhibition of CO<sub>2</sub> reduction by cyanate.** Different concentrations of potassium cyanate (final concentrations are shown in the figure) were added. Experimental conditions: 25°C, 0.2 M MES buffer (pH=7.0), rotation rate 3500 rpm.

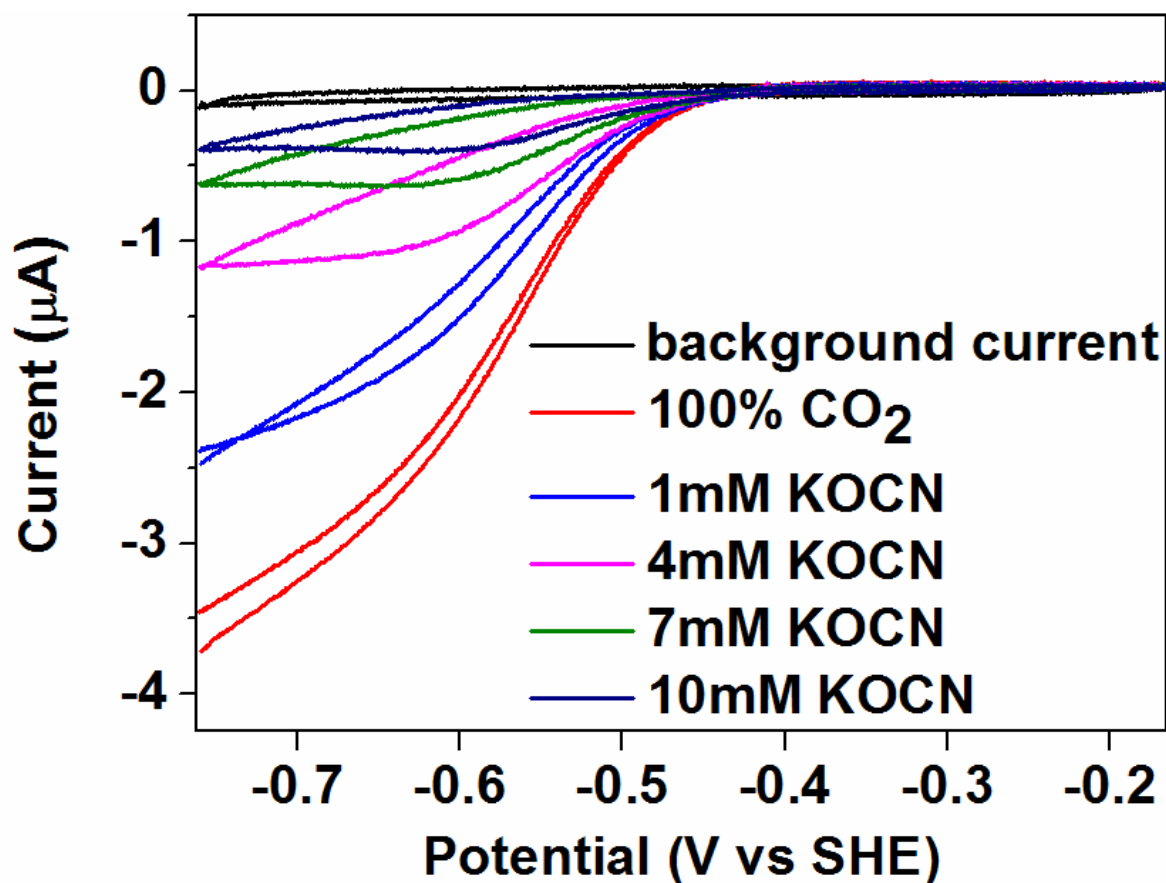

**Figure S5:** EPR spectra of (Left panel) CO-reduced CODH-I at 12 K: (A) Power = 41 mW; (B) Power = 5 mW. (Right panel) benzyl viologen-oxidized enzyme at (A) 10 K and 41 mW, (B) 10 K and 0.27 mW and (C) 26 K and 0.27 mW.

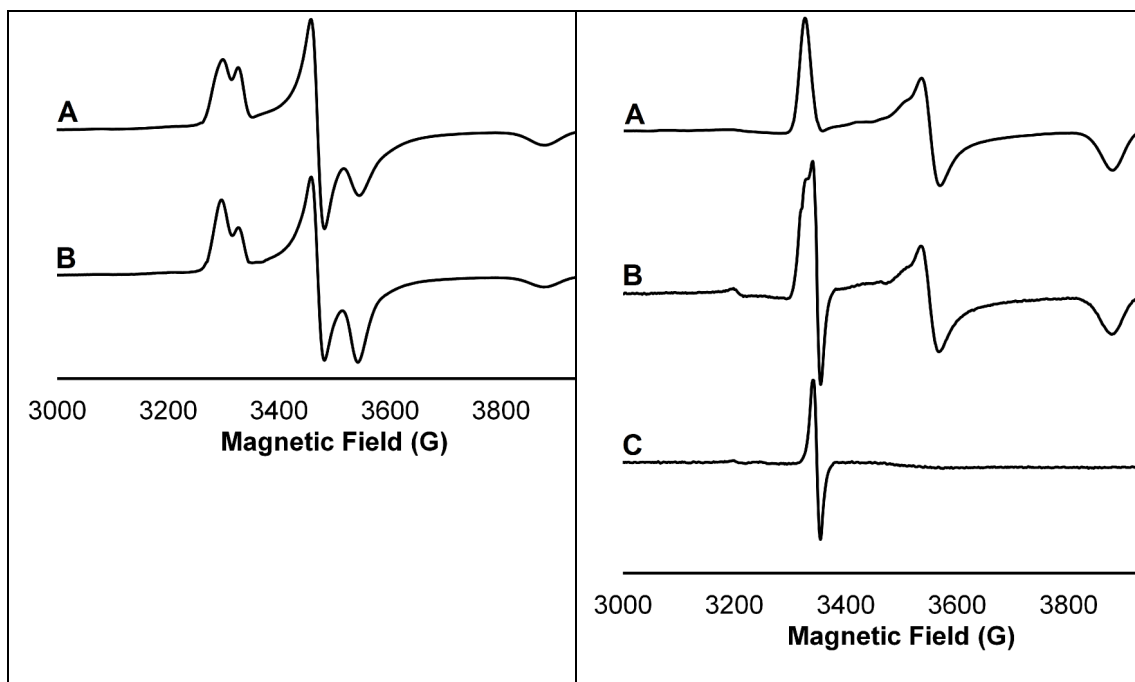

**Figure S6.** Comparison of the rates of inhibition by cyanide and sulfide. In each case, 1mM potassium cyanide or 1mM sodium sulfide was added at +160 mV. At this potential sulfide is a good inhibitor and binds much faster than cyanide. Experimental condition: 25°C, 0.2 M MES buffer (pH=7.0), rotation rate 3500 rpm.

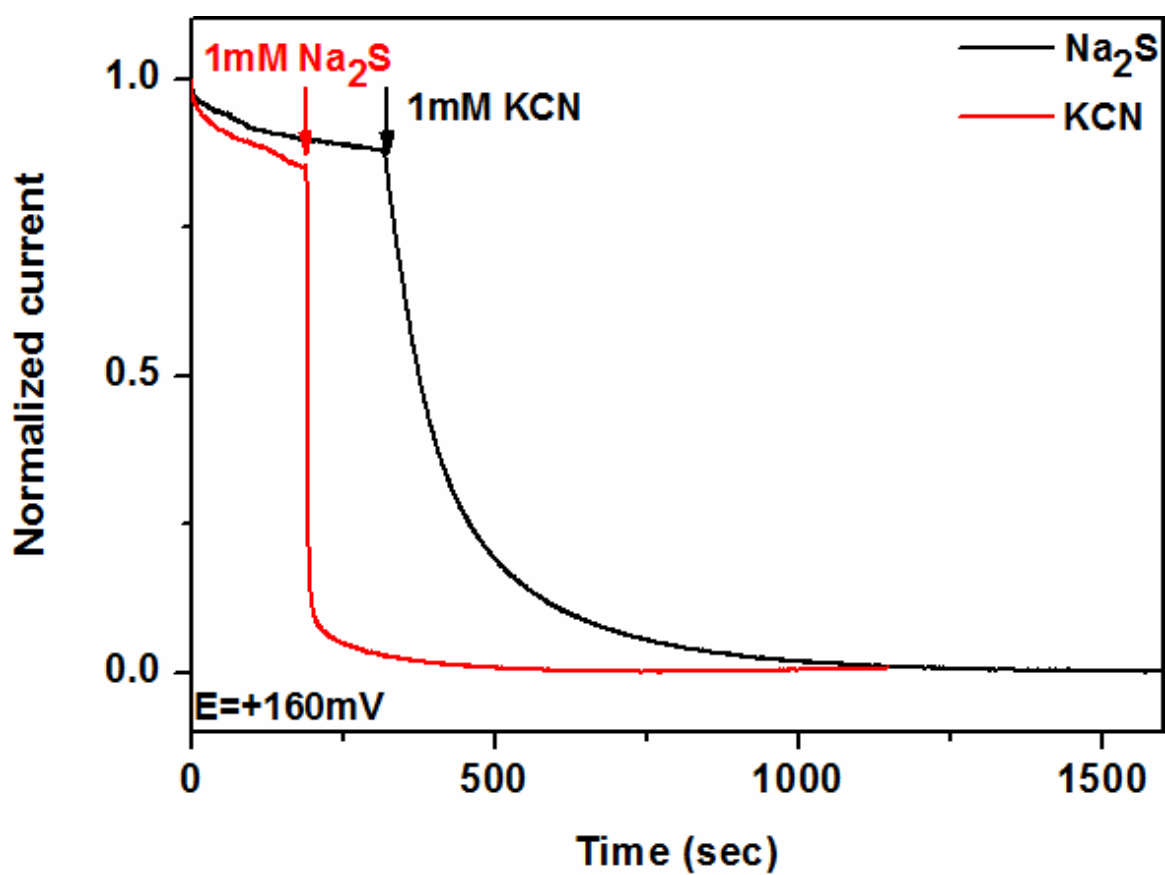

**Table S1**  $K_m$  values for  $\text{CO}_2$  and inhibition constants  $K_i$  for CO product inhibition at two different potentials

|                                                                        | <b>-560 mV</b>                 | <b>-760 mV</b>                   |
|------------------------------------------------------------------------|--------------------------------|----------------------------------|
| No CO present ( $K_m$ for $\text{CO}_2$ )                              | 8.06 mM                        | 7.08 mM                          |
| 20% CO (apparent $K_m$ for $\text{CO}_2$ )<br>(CO inhibition constant) | 40.9 mM<br>(46 $\mu\text{M}$ ) | 10.95 mM<br>(337 $\mu\text{M}$ ) |
